# Supplementary material
Source: publisher site journal article supplement (https://www.dovepress.com/article/523340)
Supplement: Supplementary file 1 [file 523340%20Supplementary%20Material.docx]

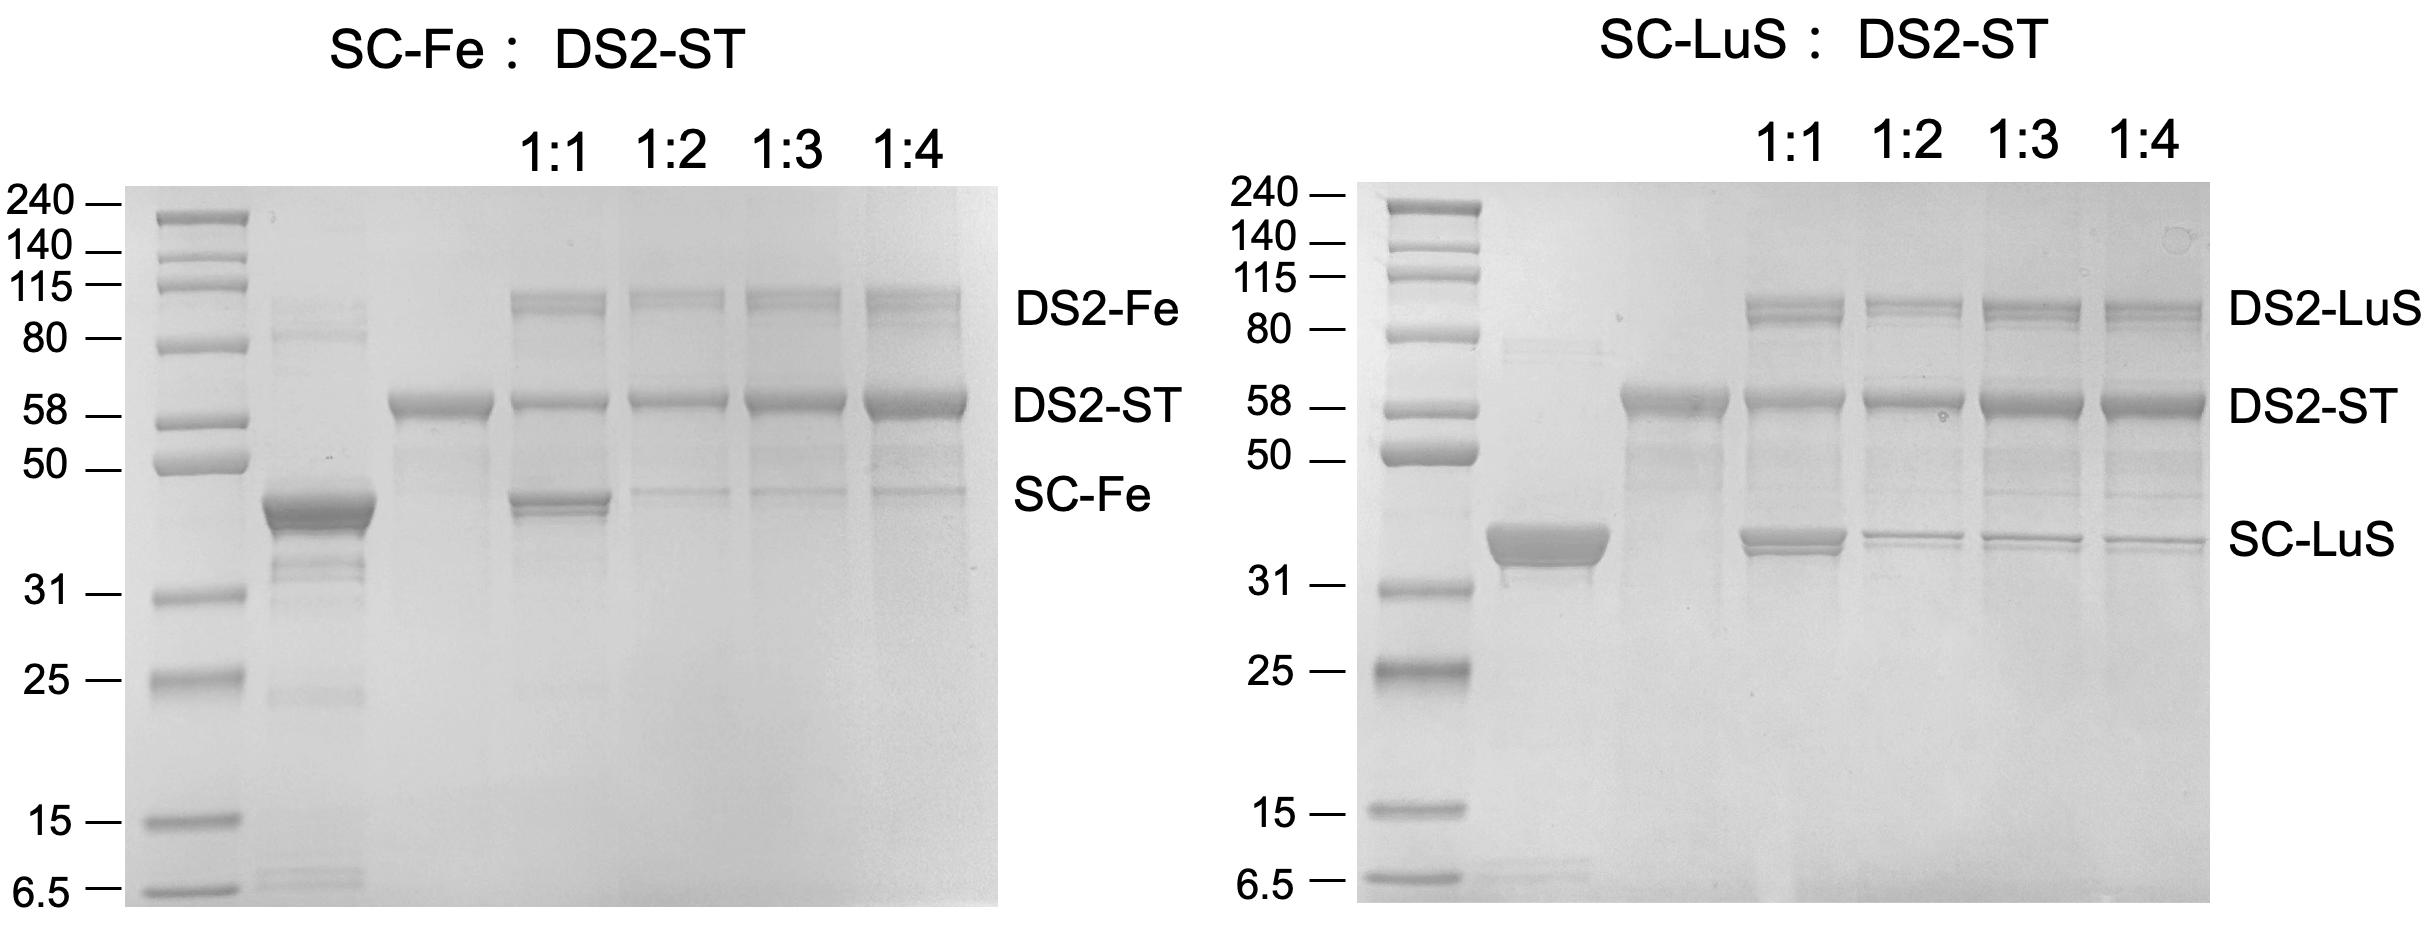


**Figure S1.** Conjugation efficiency and stability of DS2-conjugated nanoparticles. SDS-PAGE analysis of covalent association between Fe and LuS and monomeric DS2-ST at various molar ratios (1:1, 1:2, 1:3, 1:4) at 4°C overnight. The results indicate that for both DS2-Fe and DS2-LuS conjugating reaction, when the molar ratio to DS2-ST is 1:2 or greater, the residual amounts of Fe or LuS remain essentially unchanged. This suggests that at a 1:2 ratio, both achieve their maximum binding efficiency.

**Figure S2.** Related to Figure 5. Spleens from immunized mice were dissociated, stained with fluorescently labeled antibodies against surface markers, and analyzed by flow cytometry to determine immune cell populations. The Percentage of dendritic cells (DCs, CD11c+CD45+Lin-MHCII+), macrophages (CD45+F4/80+CD11b+), T follicular helper (Tfh) cells (CD4+CXCR5+PD-1+ cells), and germinal center (GC) B cells (CD19+B220+CD95+GL-7+), central memory T (Tcm) cells (CD4+CD44+CD62L+), and effector memory T (Tem) cells (CD4+CD44+CD62L-) were quantified.


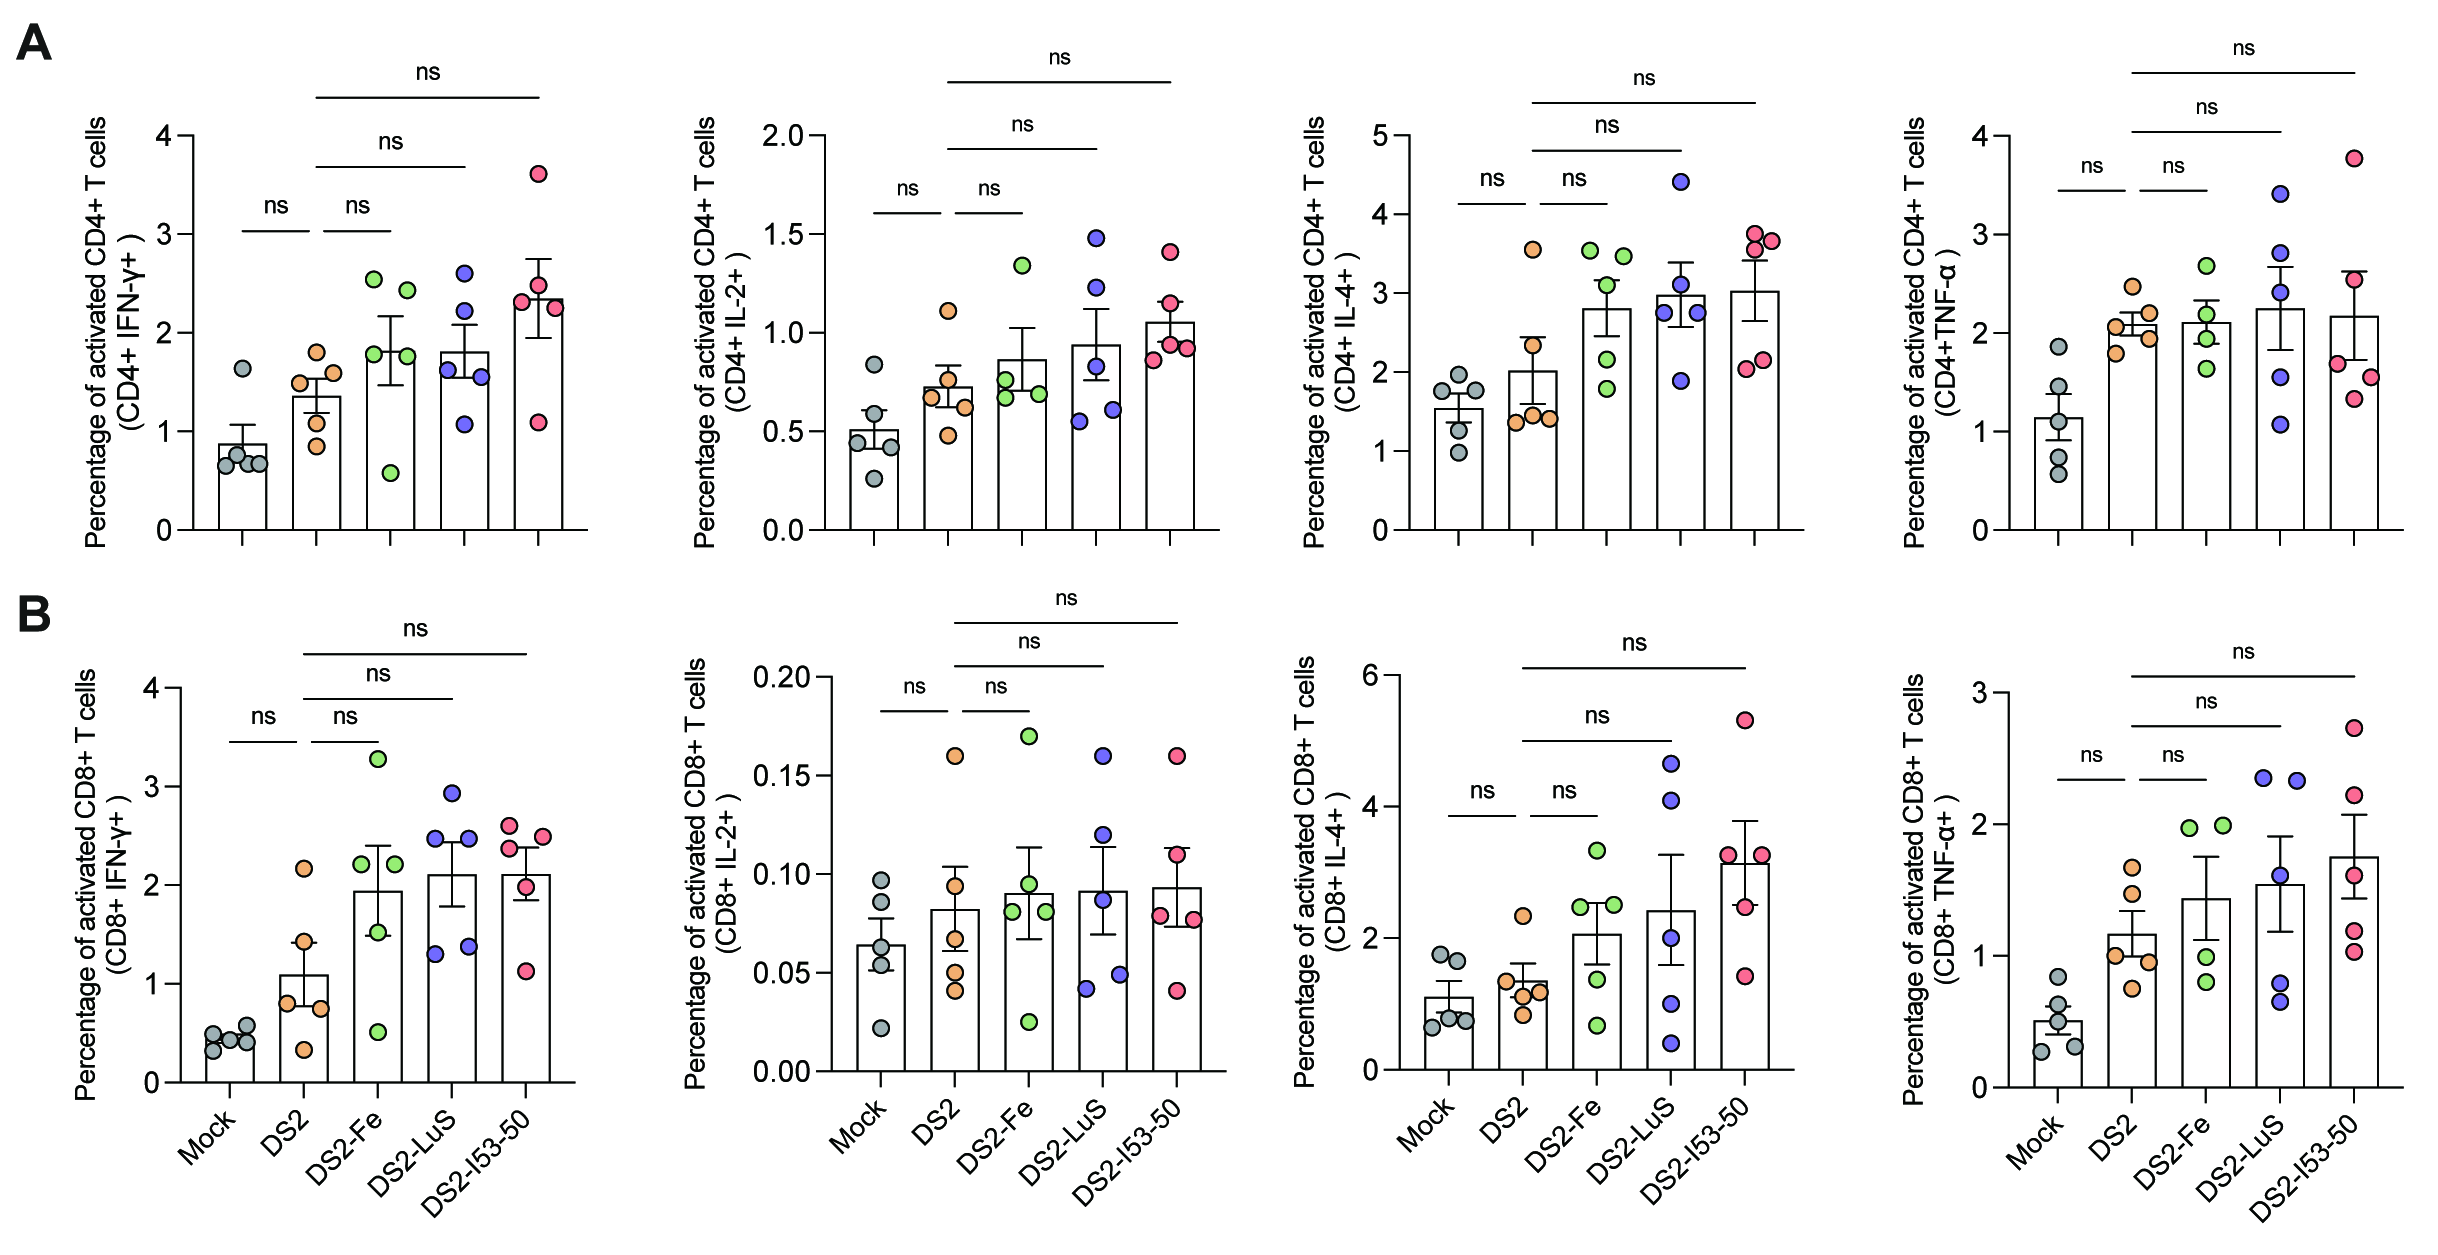
**Figure S3.** Flow Cytometric Profiling of Immune Cells in Spleens from Immunized Mice. **(A)(B)** Cytokine-secreting CD4+ and CD8+ T cells were identified by staining for CD4, CD8, and intracellular cytokines (IFN-γ, IL-2, IL-4, and TNF-α). The proportions of IFN-γ+, IL-2+, IL-4+, and TNF-α+ cells within CD4+ or CD8+ T cell populations were quantified. Data represented as mean ± SEM. Statistical analysis was performed using one-way ANOVA with Tukey's post-hoc test. Significance levels are indicated as: ns, not significant.

**Table S1.** Amino acid sequences of constructs for protein expression.

| Construct name | Amin acid sequence |
| --- | --- |
| SC-Fe | MGSSVTTLSGLSGEQGPSGDMTTEEDSATHIKFSKRDEDGRELAGATMELRDSSGKTISTWISDGHVKDFYLYPGKYTFVETAAPDGYEVATPIEFTVNEDGQVTVDGEATEGDAHTGGSGGSGGSGGSMTTASTSQVRQNYHQDSEAAINRQINLELYASYVYLSMSYYFDRDDVALKNFAKYFLHQSHEEREHAEKLMKLQNQRGGRIFLQDIKKPDCDDWESGLNAMECALHLEKNVNQSLLELHKLATDKNDPHLCDFIETHYLNEQVKAIKELGDHVTNLRKMGAPESGLAEYLFDKHTLGDSDNESLVPRGSHHHHHHHH |
| SC-LuS | MGSSVTTLSGLSGEQGPSGDMTTEEDSATHIKFSKRDEDGRELAGATMELRDSSGKTISTWISDGHVKDFYLYPGKYTFVETAAPDGYEVATPIEFTVNEDGQVTVDGEATEGDAHTGGSGGSGGSGGSMQIYEGKLTAEGLRFGIVASRFNHALVDRLVEGAIDAIVRHGGREEDITLVRVPGSWEIPVAAGELARKEDIDAVIAIGVLIRGATPHFDYIASEVSKGLADLSLELRKPITFGVITADTLEQAIERAGTKHGNKGWEAALSAIEMANLFKSLRLVPRGSHHHHHHHH |
| DS2-ST | MELPILKTNTITTILAAVTLCFASSQNITEEFYQSTCSAVSKGYLGALRTGWYTSVITIELSNIKENKCNGTDAKVKLIKQELDKYKNAVTDLQLLMQSTPAAGSGSAICSGIAVCKVLHLEGEVNKIKSALLSTNKAVVSLSNGVSVLTFKVLDLKNYIDKQLLPILNKQSCSIPNIETVIEFQQKNNRLLEITREFSVNAGVTTPVSTYMLTNSELLSLINDMPITNDQKKLMSSNVQIVRQQSYSIMCIIKEEVLAYVVQLPLYGVIDTPCWKLHTSPLCTTNTKEGSNICLTRTDRGWYCDNAGSVSFFPQAETCKVQSNRVFCDTMNSRTLPSEVNLCNIDIFNPKYDCKIMTSKTDVSSSVITSLGAIVSCYGKTKCTASNKNRGIIKTFSNGCDYVSNKGVDTVSVGNTLYCVNKQEGQSLYVKGEPIINFYDPLVFPSDEFDASISQVNEKINQSLAFIRKSDELLGYIPEAPRDGQAYVRKDGEWVLLSTFLGSGRGVPHIVMVDAYKRYKLVPRGSHHHHHHHH |
| I53-50A | MKMEELFKKHKIVAVLRANSVEEAIEKAVAVFAGGVHLIEITFTVPDADTVIKALSVLKEKGAIIGAGTVTSVEQCRKAVESGAEFIVSPHLDEEISQFCKEKGVFYMPGVMTPTELVKAMKLGHDILKLFPGEVVGPQFVKAMKGPFPNVKFVPTGGVNLDNVCKWFKAGVLAVGVGKALVKGKPDEVREKAKKFVKKIRGCTEGSLEGSHHHHHHHH |
| I53-50B | MNQHSHKDHETVRIAVVRARWHAEIVDACVSAFEAAMRDIGGDRFAVDVFDVPGAYEIPLHARTLAETGRYGAVLGTAFVVNGGIYRHEFVASAVINGMMNVQLNTGVPVLSAVLTPHNYDKSKAHTLLFLALFAVKGMEAARACVEILAAREKIAAGSLEGSHHHHHHHH |
| DS2-I53-50A | MELPILKTNTITTILAAVTLCFASSQNITEEFYQSTCSAVSKGYLGALRTGWYTSVITIELSNIKENKCNGTDAKVKLIKQELDKYKNAVTDLQLLMQSTPAAGSGSAICSGIAVCKVLHLEGEVNKIKSALLSTNKAVVSLSNGVSVLTFKVLDLKNYIDKQLLPILNKQSCSIPNIETVIEFQQKNNRLLEITREFSVNAGVTTPVSTYMLTNSELLSLINDMPITNDQKKLMSSNVQIVRQQSYSIMCIIKEEVLAYVVQLPLYGVIDTPCWKLHTSPLCTTNTKEGSNICLTRTDRGWYCDNAGSVSFFPQAETCKVQSNRVFCDTMNSRTLPSEVNLCNIDIFNPKYDCKIMTSKTDVSSSVITSLGAIVSCYGKTKCTASNKNRGIIKTFSNGCDYVSNKGVDTVSVGNTLYCVNKQEGQSLYVKGEPIINFYDPLVFPSDEFDASISQVNEKINQSLAFIRKSDELLGYIPEAPRDGQAYVRKDGEWVLLSTFLSGSGSESQVRQQFSKMKMEELFKKHKIVAVLRANSVEEAIEKAVAVFAGGVHLIEITFTVPDADTVIKALSVLKEKGAIIGAGTVTSVEQCRKAVESGAEFIVSPHLDEEISQFCKEKGVFYMPGVMTPTELVKAMKLGHTILKLFPGEVVGPQFVKAMKGPFPNVKFVPTGGVNLDNVCEWFKAGVLAVGVGSALVKGTPDEVREKAKAFVEKIRGCTELVPRGSHHHHHHHH |
